# Supplementary material
Source: Springer Nature journal article supplement (http://www.springermedizin.de/resource/supplementary/13018_2006_16_MOESM1_ESM.pdf/9636136)

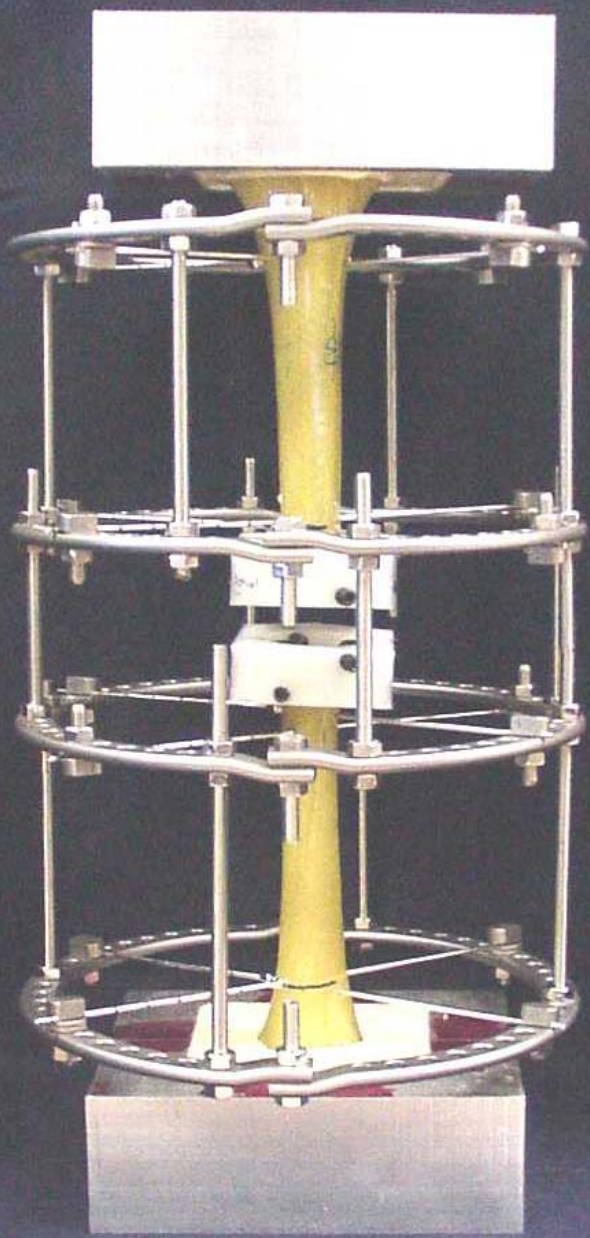

A

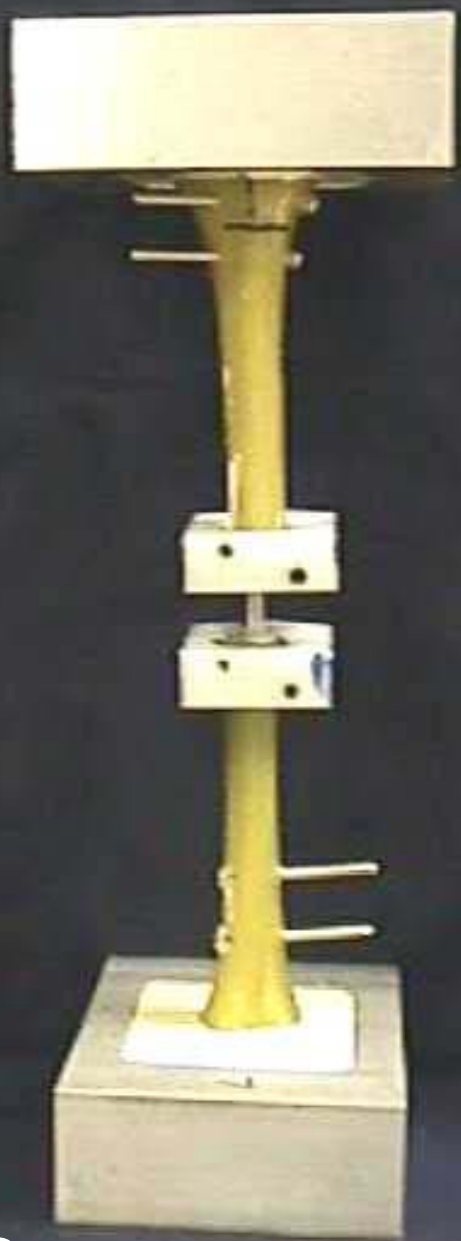

B

Supplement: MOESM1 [file 9636136]
